# Supplementary material for: An amperometric cholesterol biosensor with excellent sensitivity and limit of detection based on an enzyme-immobilized microtubular ZnO@ZnS heterostructure
Source: Royal Society of Chemistry journal article supplement (doi:10.1039/c4ta03627a), 2014-08-19
Supplement: c4ta03627a1.pdf [file c4ta03627a1.pdf]

## **Electronic Supplementary Information (ESI)**

# **Amperometric Cholesterol Biosensor Based on Enzyme Immobilized Microtubular ZnO@ZnS Heterostructure with Excellent Sensitivity and LOD**

Arnab Kanti Giri,<sup>a</sup> Chumki Charan,<sup>b</sup> Arka Saha,<sup>a</sup> Vinod Kumar Shahi,<sup>b\*</sup> Asit Baran Panda <sup>a\*</sup>

<sup>a</sup> Discipline of Inorganic Materials and Catalysis, Academy of Scientific and Innovative Research, Central Salt and Marine Chemicals Research Institute (CSIR), G.B. Marg, Bhavnagar-364002, Gujarat, India. Fax: +91-2782567562; Tel: +91-2782567760 Ext. 704; E-mail: [abpanda@csmcri.org](mailto:abpanda@csmcri.org)

<sup>b</sup> Electro-Membrane Processes discipline and Academy of Scientific and Innovative Research, Central Salt and Marine Chemicals Research Institute, G.B. Marg, Bhavnagar-364002, Gujarat, India

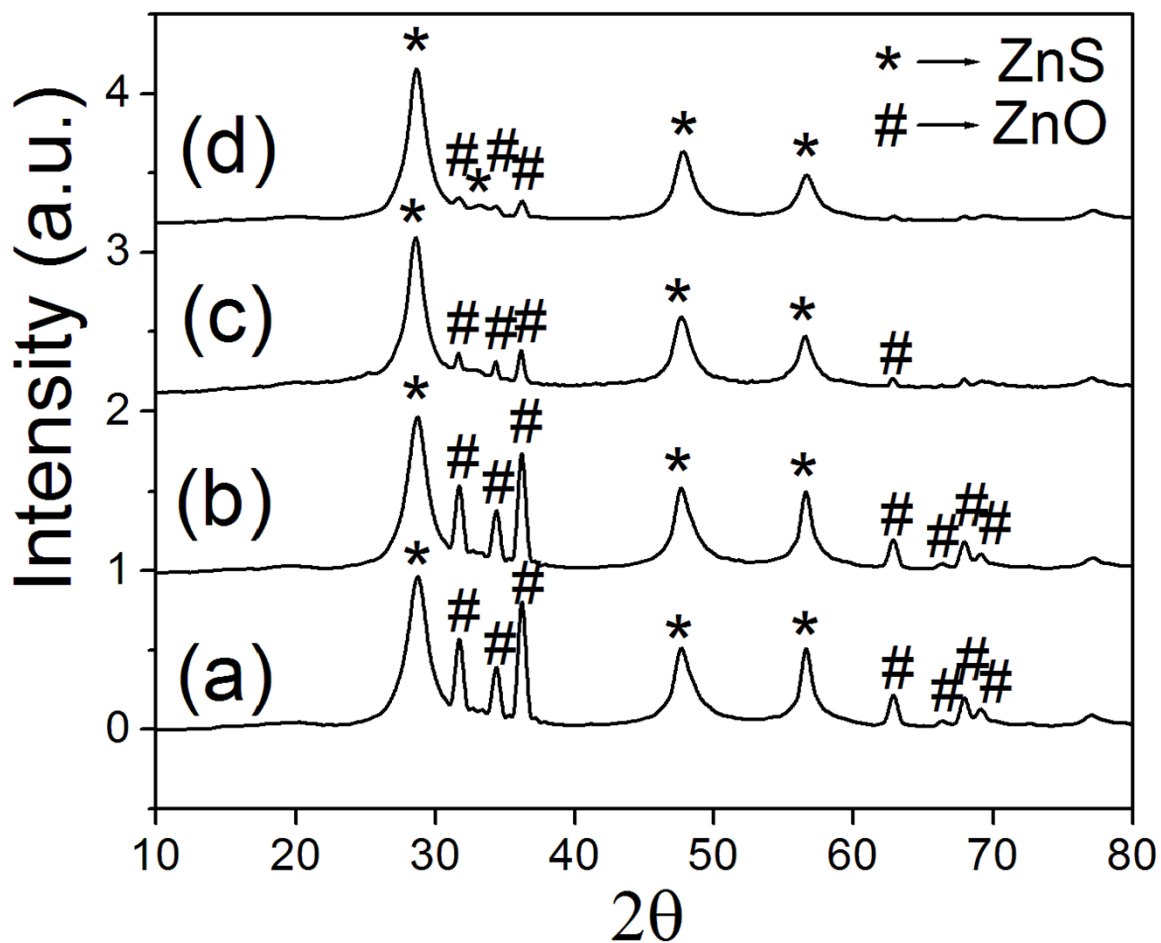

**Fig. S1** XRD pattern of the synthesized microtubular ZnO@ZnS heterostructure with varying amount of ZnS, obtained reacting the ZnO and Na<sub>2</sub>S for (a) 30 min., (b) 1h, (c) 2h and (d) 3h.

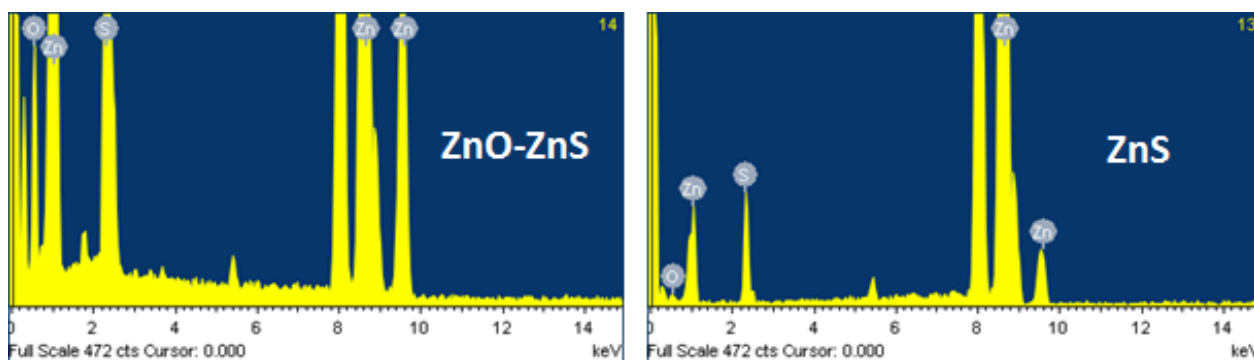

**Fig. S2** EDX spectra of the synthesized microtubular ZnO@ZnS heterostructure and ZnS.

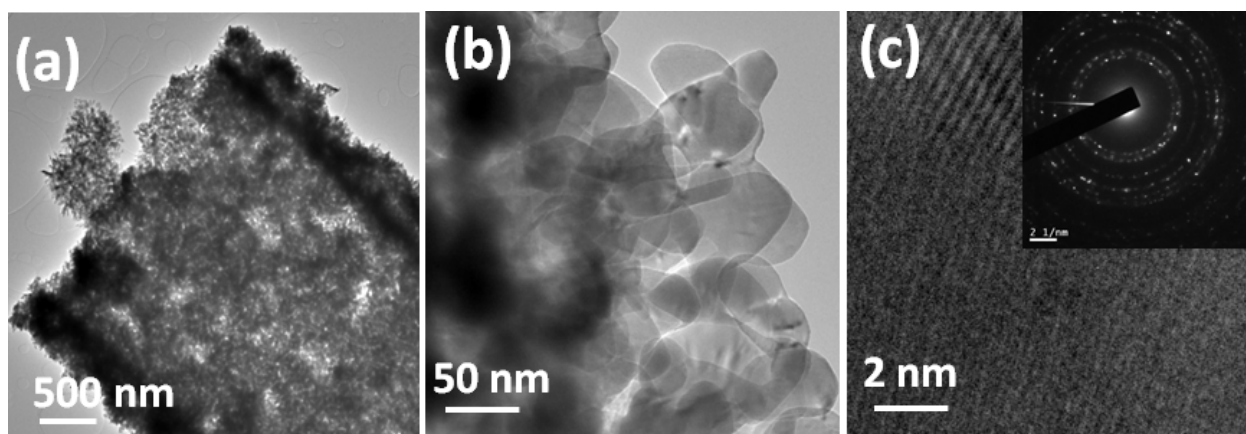

**Fig. S3** TEM (a, b) and HRTEM (c) images of the synthesized ZnO microtubes obtained on calcination (500 °C for 2 h) of corresponding hydrozincite microtube. Inset of (c) represents the corresponding SAED pattern.

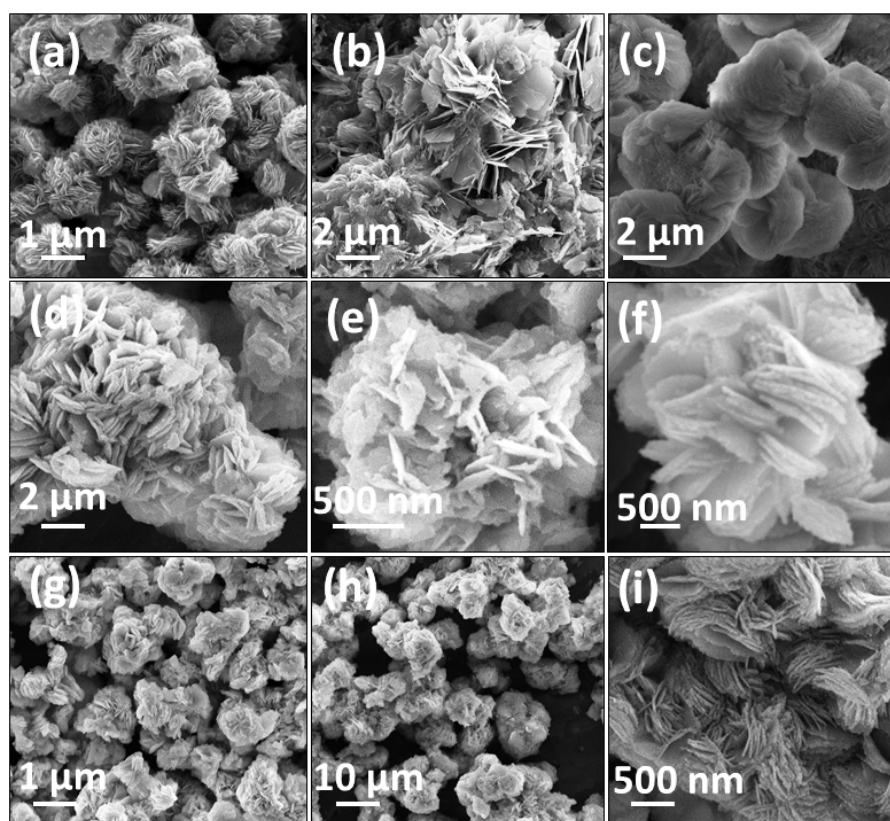

**Fig. S4** SEM images of bare ZnO with woolen thread (a), nest like structure (b) and Flakes towards flower (c); corresponding ZnO@ZnS heterostructure with woolen thread (d), nest like structure (e) and Flakes towards flower (f) morphology obtained after sulfidation of respective ZnO using  $\text{Na}_2\text{S}$  for 2h; Corresponding ZnS morphology of woolen thread (g), nest like structure (h) and Flakes towards flower (i) obtained after leaching of ZnO from respective ZnO-ZnS heterostructure using acetic acid.

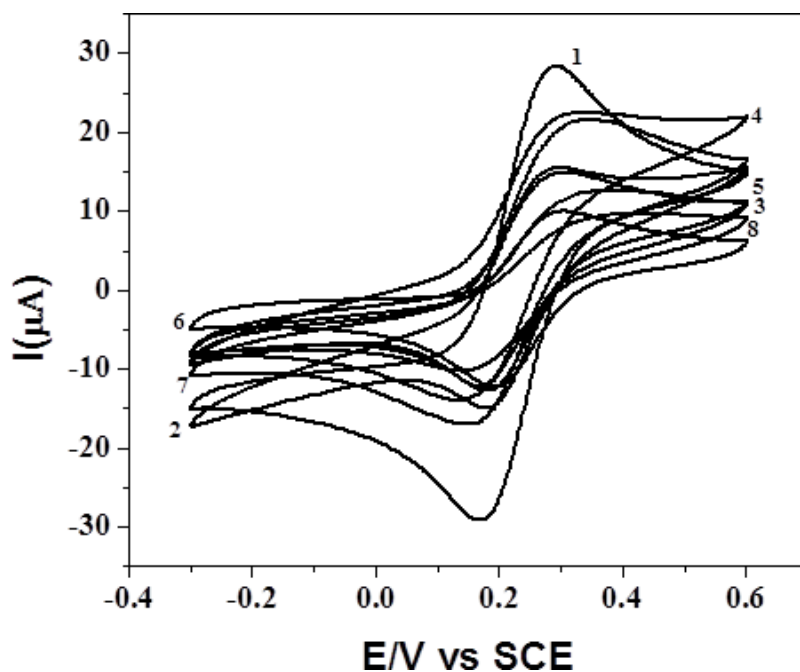

**Fig. S5** CVs of different ZnO, ZnS and ZnO@ZnS modified bioelectrodes at a scan rate  $50 \text{ mV s}^{-1}$ . 1: ZnO@ZnS (microtube); 2: ZnS (microtube); 3: ZnO@ZnS( woollen thread); 4: ZnS (woollen thread); 5: ZnS (Nest like structure); 6: ZnO@ZnS (Nest like structure); 7: ZnS (Flakes towards flowers); and 8: ZnO@ZnS(Flakes towards flowers).

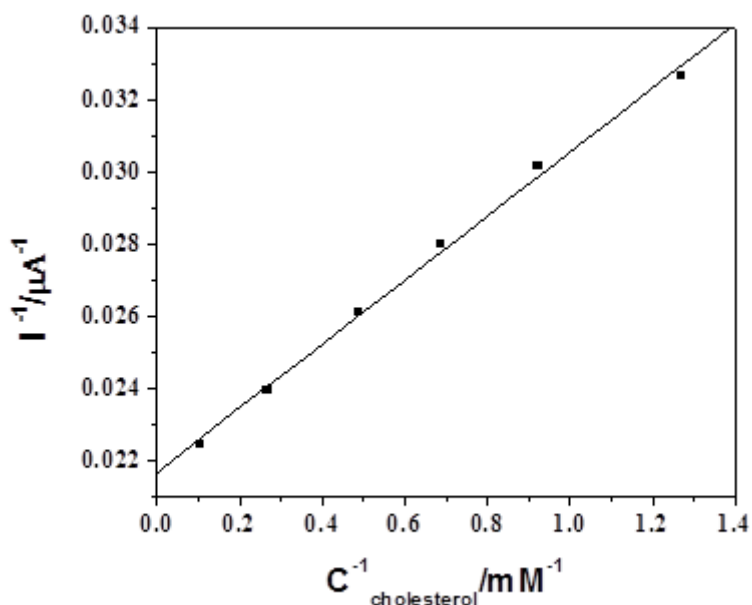

**Fig. S6** Lineweaver-Burk plot for peak current response during cholesterol sensing.

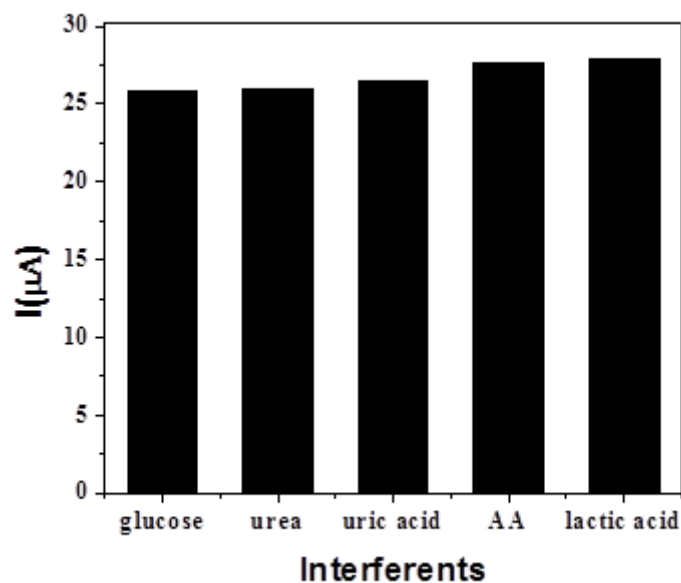

**Fig. S7** Effect of Interference on ChOx/Chit./ZnO@ZnS/GCE bioelectrode during cholesterol sensing.

**Table S1.** Comparison of the performances of various types of cholesterol biosensors.

| Electrode materials         | Sensitivity<br>( $\text{mA.M}^{-1} \text{cm}^{-2}$ ) | LOD<br>(mM) | Reference           |
|-----------------------------|------------------------------------------------------|-------------|---------------------|
| ZnO microtube               | 54.5                                                 | 0.200       | 1                   |
| Pt-Au@ZnONRs                | 26.8                                                 | 30          | 2                   |
| MWCNTs/SiO <sub>2</sub> -CS | 3.8                                                  | 0.016       | 3                   |
| MWNTs-Au/PPD                | 0.559                                                | 0.200       | 4                   |
| DTSP-Au                     | 0.054                                                | 0.022       | 5                   |
| polypyrrole                 | 0.044                                                | -           | 6                   |
| PANI-MWCNTs                 | 6.8                                                  | -           | 7                   |
| Au Nanowire                 | 0.85                                                 | -           | 8                   |
| <b>ZnO@ZnS microtube</b>    | <b>52.67</b>                                         | <b>0.02</b> | <b>Present work</b> |

**Reference.**

1. A. K. Giri, A. Sinhamahapatra, S. Prakash, J. Chaudhari, V. K. Shahi and A. B. Panda, *J. Mater. Chem. A.*, 2013, **1**, 814.
2. C. Wang, X. Tan, S. Chen, R. Yuan, F. Hua, D. Yuan and Y. Xiang, *Talanta.*, 2012, **94**, 263.
3. P. R. Solanki, A. Kaushik, A. A. Ansari, A. Tiwari and B. D. Malhotra, *Sens. Actuators B Chem.*, 2009, **137**, 727.
4. M. Guo, J. Chen, J. Li, L. Nie and S. Yao, *Electroanalysis.*, 2004, **16**, 1992.
5. A. Parra, E. Casero, F. Pariente, L. Vázquez and E. Lorenzo, *Anal. Bioanal. Chem.*, 2007, **388**, 1059.
6. J. C. Vidal, E. Garcia and J. R. Castillo, *Anal. Chim. Acta.*, 1999, **385**, 213.
7. C. Dhand, S. K. Arya, M. Datta and B. D. Malhotra, *Anal. Biochem.*, 2008, **383**, 194.
8. A. I. Gopalan, K. P. Lee and D. Ragupathy, *Biosens. Bioelectron.*, 2009, **24**, 2211.
